# Supplementary material for: Uniform cobalt nanoparticles embedded in hexagonal mesoporous nanoplates as a magnetically separable, recyclable adsorbent
Source: publisher site journal article supplement (doi:10.3762/bjnano.9.168), 2018-06-13
Supplement: Additional file 1 [file 2190-4286-9-168-S1.pdf]

# Supporting Information

for

## **Uniform cobalt nanoparticles embedded in hexagonal mesoporous nanoplates as a magnetically separable, recyclable adsorbent**

Can Zhao<sup>1</sup>, Yuexiao Song<sup>1</sup>, Tianyu Xiang<sup>1</sup>, Wenxiu Qu<sup>1</sup>, Shuo Lou<sup>1</sup>, Xiaohong Yin<sup>2</sup>  
and Feng Xin<sup>\*1</sup>

Address: <sup>1</sup>School of Chemical Engineering and Technology, Tianjin University, Tianjin 300350, China and <sup>2</sup>Tianjin Key Laboratory of Organic Solar Cells and Photochemical Conversion, School of Chemistry and Chemical Engineering, Tianjin University of Technology, Tianjin 300384, China

\*Corresponding author

Email: Feng Xin - xinf@tju.edu.cn

# Additional experimental data

## Adsorption isotherms and kinetics of RB

Adsorption isotherms are significant data for investigating the adsorption mechanism and the interactions between contaminant and adsorbents. Our adsorption experiments for RB dye with different initial RB concentrations (10 to 100 mg/L) were proceed at initial pH (about 6.9), constant temperature ( $T = 25$  °C) with a certain period of adsorption time ( $t = 2$  h). The Langmuir isotherm model is selected in this study to analyze the equilibrium adsorption of RB onto the NPLs-2.5-800 adsorbent, which can be expressed as the following Eq. (S1)

$$\frac{C_e}{Q_e} = \frac{C_e}{Q_{max}} + \frac{1}{Q_{max}K_l} \quad (S1)$$

where  $C_e$  is the equilibrium concentration of RB in the solution (mg/L);  $Q_e$  represents the equilibrium amount of adsorbed dye per unit mass of the NPLs-2.5-800 (mg/g);  $K_l$  (L/mg) and  $Q_{max}$  (mg/g) are the Langmuir adsorption constant associated with the energy of adsorption and maximum adsorption capacity, respectively.

Pseudo-first-order, pseudo-second-order, and Weber-Morris intraparticle diffusion models are used. They are denoted as the following Eq. (S2), (S3) and (S4), respectively.

$$\ln(Q_e - Q_t) = \ln Q_e - K_1 t \quad (S2)$$

$$\frac{t}{Q_t} = \frac{1}{K_2 Q_e^2} + \frac{1}{Q_e} t \quad (S3)$$

$$Q_t = K_3 t^{1/2} + C \quad (S4)$$

where  $Q_e$  (mg/g) and  $Q_t$  (mg/g) are the amount of adsorbed RB at equilibrium and at contact time  $t$  (min), respectively.  $K_1$  ( $\text{min}^{-1}$ ) is the rate constant of pseudo-first-order and can be calculated from the plot of  $\log(Q_e - Q_t)$  against  $t$  in Eq. (S2).  $K_2$  is the rate constant of pseudo-second-order

(g/min·mg).  $K_3$  (mg/g·min) is the intraparticle diffusion rate constant and  $C$  (mg/g) is another constant related to the boundary layer thickness.

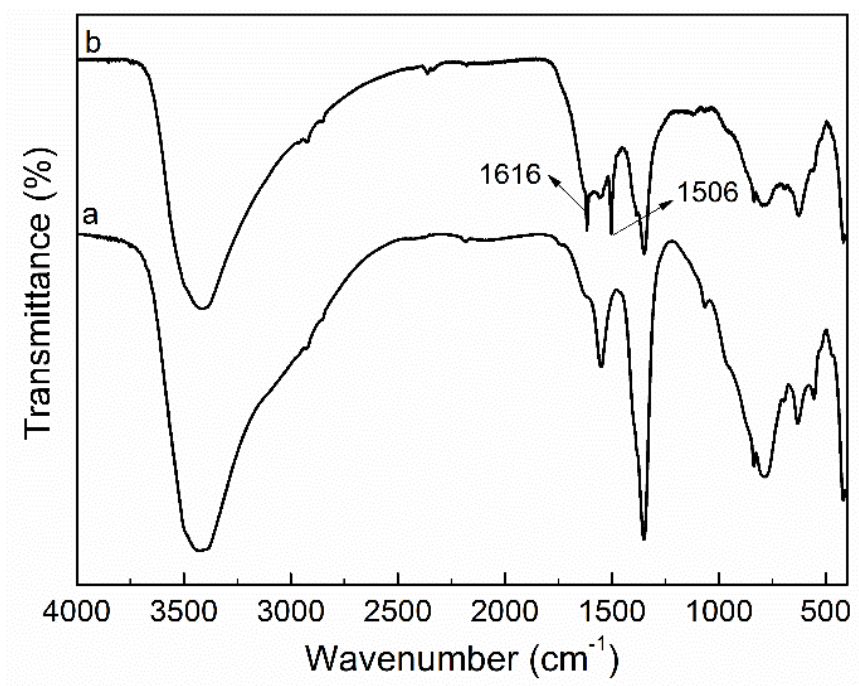

**Figure S1:** FTIR analysis of the samples: (a) pure CoAl LDH and (b) LDH@PDA-2.5 composite.

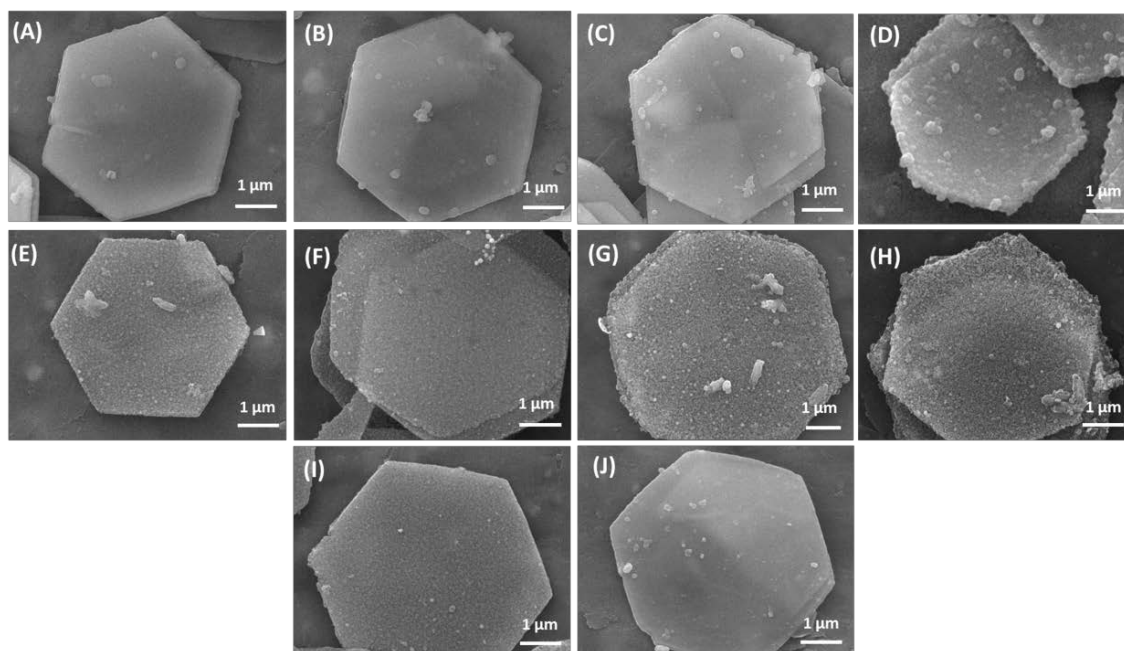

**Figure S2:** SEM images of samples: (A)–(D) LDH@PDA prepared with different initial dopamine hydrochloride concentrations: (A) 1.0, (B) 1.5, (C) 2.0, and (D) 3.0 g/L; (E)–(H) the NPLs prepared by carbonization of the above LDH@PDA at 800 °C for 2 h; (I)–(J) the NPLs prepared by carbonization of LDH@PDA-2.5 at different temperatures for 2 h: (I) 650 and (J) 500 °C.

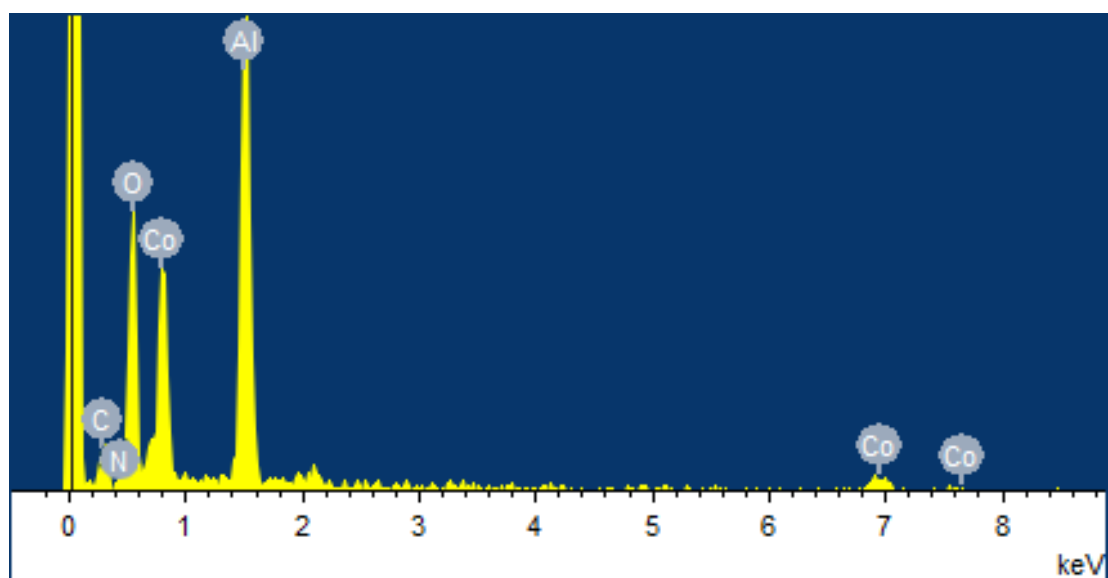

**Figure S3:** Energy-dispersive X-ray spectrum of the NPLs-2.5-800 sample.

**Table S1:** Elemental analysis of the NPLs-2.5-800 sample based on EDX data.

| Elements | Weight (%) | Atom (%) |
|----------|------------|----------|
| C        | 8.13       | 18.01    |
| N        | 0.92       | 1.75     |
| O        | 21.19      | 35.21    |
| Al       | 25.48      | 25.08    |
| Co       | 44.28      | 19.95    |

**Table S2:** Structural, textural, and magnetic properties of the as-prepared samples.

| Samples      | $S_{\text{BET}}^a$<br>( $\text{m}^2/\text{g}$ ) | $S_{\text{micro}}^b$<br>( $\text{m}^2/\text{g}$ ) | $S_{\text{meso}}^c$<br>( $\text{m}^2/\text{g}$ ) | $V_p^d$<br>( $\text{cm}^3/\text{g}$ ) | $D^e$ (nm) | Magnetic<br>saturation<br>value (emu/g) |
|--------------|-------------------------------------------------|---------------------------------------------------|--------------------------------------------------|---------------------------------------|------------|-----------------------------------------|
| NPLs-1.0-800 | 59                                              | 15                                                | 44                                               | 0.21                                  | 18.6       | 12.3                                    |
| NPLs-2.0-800 | 70                                              | 21                                                | 49                                               | 0.24                                  | 17.8       | 40.1                                    |
| NPLs-2.5-800 | 124                                             | 33                                                | 91                                               | 0.33                                  | 9.5        | 31.2                                    |
| NPLs-2.5-650 | 56                                              | 10                                                | 46                                               | 0.23                                  | 9.1        | 1.3                                     |
| NPLs-2.5-500 | 47                                              | 8                                                 | 39                                               | 0.08                                  | 7.0        | /                                       |

<sup>a</sup>  $S_{\text{BET}}$  (total surface area) is calculated using the BET method. <sup>b</sup>  $S_{\text{micro}}$  (micropore surface area) and

<sup>c</sup>  $S_{\text{meso}}$  (mesopore surface area) are calculated using the  $t$ -plot method. <sup>d</sup>  $V_p$  is the total

pore volume of micro- and mesopores. <sup>e</sup>  $D$  is the mean pore size estimated by NLDFT method.

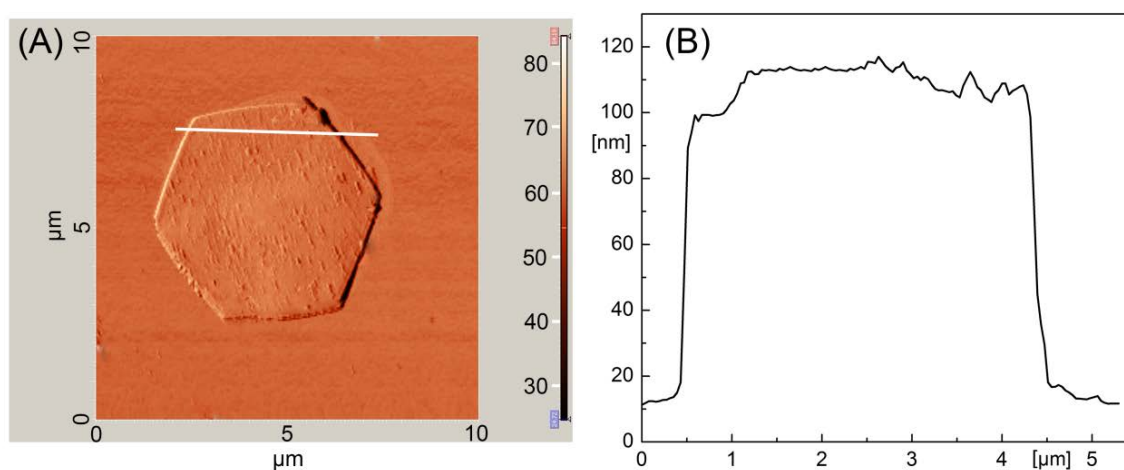**Figure S4:** (A) AFM image and (B) height profile of the as prepared NPLs-2.5-800 sample.

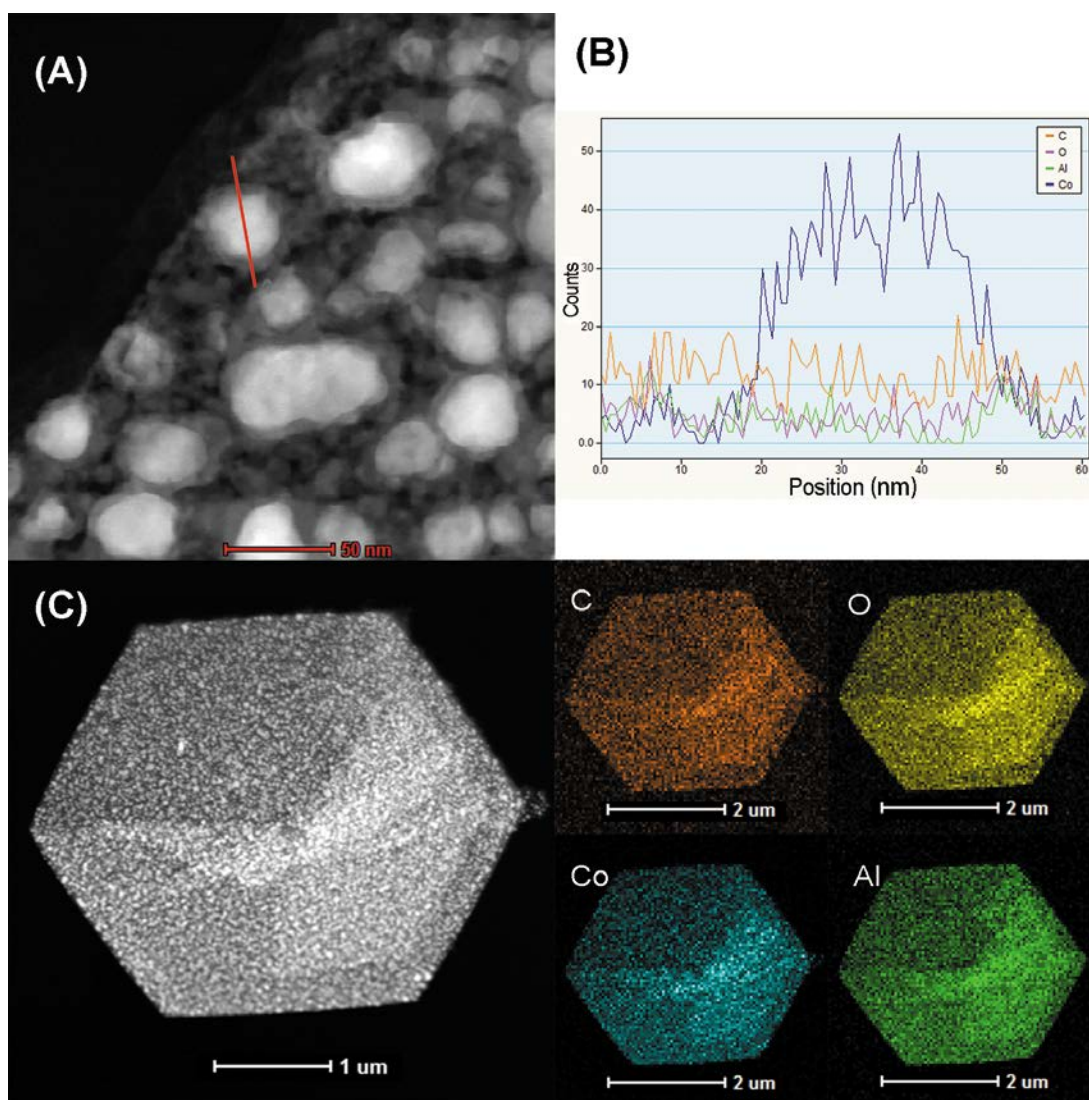

**Figure S5:** (A) HAADF-STEM image of the NPLs-2.5-800 sample. (B) C, O, Al and Co elemental line profiles along the red line across the sample in (A). (C) Dark-field TEM image of the NPLs-2.5-800 and examination of the corresponding elemental mappings of C, O, Co, and Al.

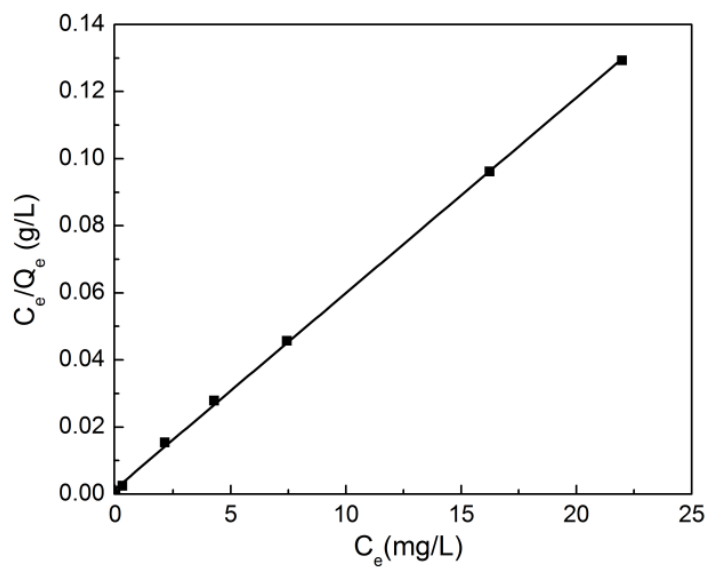

**Figure S6:** Fitting of the adsorption isotherm of RB on the hexagonal magnetic mesoporous NPLs-2.5-800 by using the Langmuir model.

**Table S3:** Parameters of adsorption isotherms for removal of RB from water by the hexagonal magnetic mesoporous NPLs-2.5-800.

| Isotherms | Parameters |       |        |
|-----------|------------|-------|--------|
|           | $Q_{max}$  | $K_l$ | $R^2$  |
| Langmuir  | 172.41     | 3.05  | 0.9995 |

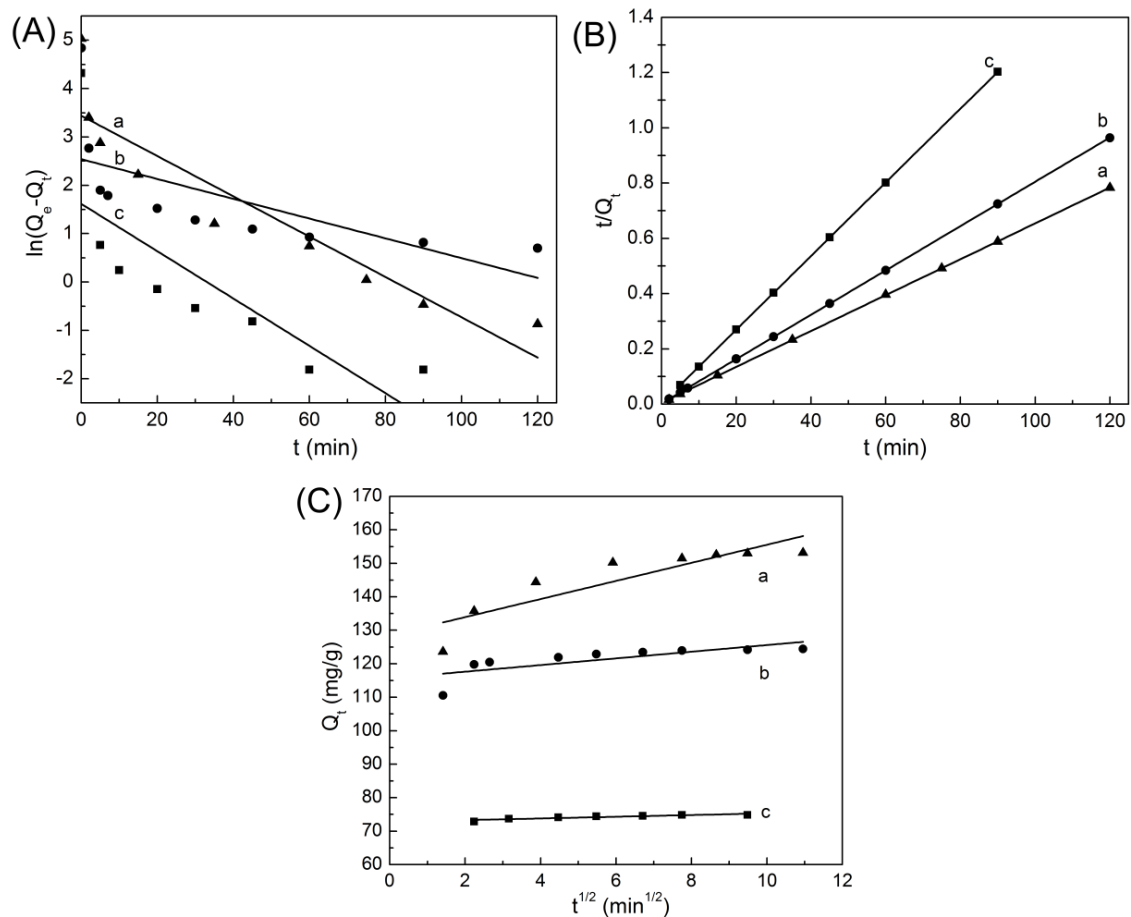

**Figure S7:** (A) Pseudo-first-order adsorption rates, (B) pseudo-second-order adsorption rates, and (C) intraparticle diffusion rates for RB adsorption onto the hexagonal magnetic mesoporous NPLs-2.5-800 at different initial RB concentrations: (a) 35, (b) 25, and (c) 15 mg/L.



**Table S4:** The parameters of adsorption kinetic for removal of RB from water by the hexagonal magnetic mesoporous NPLs-2.5-800 at different initial RB concentrations.

| Concentration of RB (mg/L) | Pseudo-first-order |       |        | Pseudo-second-order |       |        | Intraparticle diffusion |        |        |
|----------------------------|--------------------|-------|--------|---------------------|-------|--------|-------------------------|--------|--------|
|                            | $Q_e$              | $K_1$ | $R^2$  | $Q_e$               | $K_2$ | $R^2$  | $K_3$                   | $C$    | $R^2$  |
| 15                         | 3.19               | 0.049 | 0.5982 | 75.02               | 0.068 | 1      | 0.25                    | 72.78  | 0.8309 |
| 25                         | 12.66              | 0.021 | 0.4539 | 124.69              | 0.024 | 1      | 0.99                    | 115.65 | 0.5775 |
| 35                         | 31.15              | 0.042 | 0.8623 | 154.08              | 0.008 | 0.9999 | 2.70                    | 128.54 | 0.7861 |

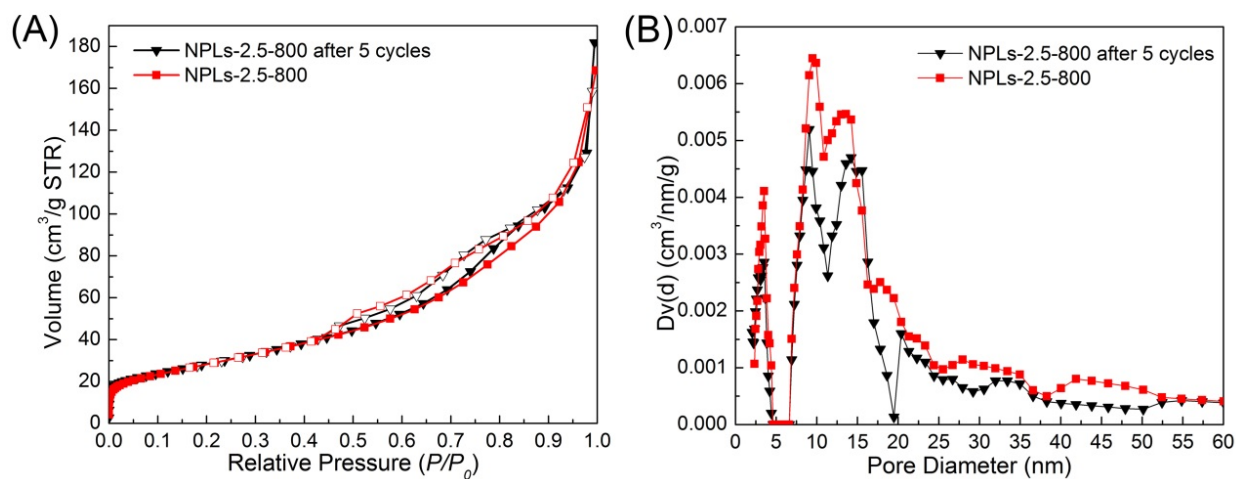

**Figure S8:** (A) Nitrogen adsorption-desorption isotherms of the NPLs-2.5-800 sample before and after five cycles. (B) Corresponding pore size distributions derived from the adsorption branches using NLDFT method.

**Table S5:** Comparison of adsorption capacity of various adsorbents for RB dye removal.

| Adsorbent                                                                       | Feedstock                                             | Method used                | $Q_{\max}$<br>(mg/g) | Reference  |
|---------------------------------------------------------------------------------|-------------------------------------------------------|----------------------------|----------------------|------------|
| Magnetite/reduced graphene oxide                                                | Fe <sub>3</sub> O <sub>4</sub> , graphene oxide       | Hydrothermal method        | 4.23                 | [S1]       |
| Carbon/iron oxide                                                               | Activated carbon, iron oxide                          | Hydrothermal carbonization | 47.44                | [S2]       |
| C <sub>16</sub> /SiO <sub>2</sub> -Fe <sub>3</sub> O <sub>4</sub> nanoparticles | Fe <sub>3</sub> O <sub>4</sub> , hexadecyl, Si-OH     | Solvothermal method        | 36.50                | [S3]       |
| Graphene-Fe <sub>3</sub> O <sub>4</sub> nanocomposite                           | Graphite oxide, PDDA, Fe <sub>3</sub> O <sub>4</sub>  | Chemical co-precipitation  | 166.40               | [S4]       |
| Graphene oxide-Fe <sub>3</sub> O <sub>4</sub> nanoparticles                     | Graphene oxide, FeCl <sub>3</sub> , FeCl <sub>2</sub> | Chemically synthesis       | 44.40                | [S5]       |
| Ni@graphene nanocomposites                                                      | Graphite oxide, Ni-contained precursor                | Ultrasonic process         | 83.00                | [S6]       |
| Oligo-layer graphite nanoflakes                                                 | [Bmim][FeCl <sub>4</sub> ], fructose                  | Ionothermal synthesis      | 150.00               | [S7]       |
| NPLs-2.5-800                                                                    | CoAl LDH, PDA                                         | Hydrothermal carbonization | 172.41               | This study |

## References

- [S1] Sun, H.; Cao, L.; Lu, L. *Nano Res.* **2011**, *4*, 550–562.
- [S2] Singh, K. P.; Gupta, S.; Singh, A. K.; Sinha, S. *Chem. Eng. J.* **2010**, *165*: 151–160.
- [S3] Chang, Y.; Ren, C.; Yang, Q.; Zhang, Z.; Dong, L.; Chen, X.; Xue, D. *Appl. Surf. Sci.* **2011**, *257*, 8610–8616.
- [S4] Lu, W.; Wu, Y.; Chen, J.; Yang, Y. *Crystengcomm* **2014**, *16*, 609–615.
- [S5] Geng, Z.; Lin, Y.; Yu, X.; Shen, Q.; Ma, L.; Li, Z.; Pan, N.; Wang, X. *J. Mater. Chem.* **2012**, *22*, 3527–3535.
- [S6] Zhao, C.; Guo, J.; Yang, Q.; Tong, L.; Zhang, J.; Zhang, J.; Gong, C.; Zhou, J.; Zhang, Z. *Appl. Surf. Sci.* **2015**, *357*, 22–30.
- [S7] Xie, Z. L.; Huang, X.; Titirici, M. M.; Taubert, A. *Rsc Adv.* **2014**, *4*, 37423–37430.
